# Supplementary material
Source: MDPI journal article supplement (https://www.mdpi.com/2414-4088/6/12/113)
Supplement: s1 [file s1]

# Semi-structured Interview:

## NAVIGATION-TO-ELEMENT INTERFACES USABILITY

This interview contains statements regarding the user experience during the training and testing sessions with different navigation to element user interfaces in the Tactonom Reader. We will fill the document based on the user's personal experience. Additional questions and answers will be added to this document report as well. The interview will additionally be recorded with an audio-recorder in order to document the conversation without disrupting the flow of the conversation.

The interview will be semi-structured and conducted after the experimental sessions with the Tactonom Reader device. During the usability test phase, the participants might have a special interaction with, or an interesting reaction to the device. This will have an influence on the semi-structured interview, additional questions regarding these interactions will be asked.

### 1. Favorite method:

What was your preferable element-location method?

Why was this element-location method your preferred method?

What was this element-location method's most remarkable characteristic?

What would you change/remove to improve it?

### 2. Worst method:

What was your least preferred element-location method?

Why was this element-location method your least preferred method?

If applicable: Did it not work properly? Was there not enough training? Were the elements selected particularly difficult to localize?

What would you change/remove to improve it?

### 3. All methods:

Do you think the methods were useful in guiding a blind or visually impaired user to a specific tactile element in a tactile graphic; or it is just an addition that most people will not use?

If not, which method would you use to achieve this?

Why would that method be better ? (user interface characteristics).

Was the training session sufficient for all the different methods?

From a scale of 0 to 10 how would you evaluate each method regarding their effectiveness in guiding a blind or visually impaired user to a specific tactile element in a tactile graphic?

#### 4. Tactonom Reader:

What would you improve in the Tactonom Reader user interface?

What is your opinion regarding the 2D tactile graphics?

Additional questions regarding specific interactions or reactions during the usability test phase will be added here, based on the observations that were obtained during the experiment.

#### 5. Strategy:

What is your strategy to find an element in a new two-dimensional graphic ?

Does your strategy depend on the type of graphic? (i.e., for a floor plan, it might be one but for a table sheet graphic or a diagram, it might be different)

After having the experience with these techniques, would you still go with your usual approach, or would you use these new algorithms if they are available?

Was operating the navigation-to-element menu intuitive? (You select the navigation option in the main menu and then you select the element that you want to navigate into)

In case you did not find the navigation-to-element menu intuitive to operate, would you have a suggestion how it could be improved in the future?

If applicable: How would you order the graphical elements in the menu option?
