# Supplementary material
Source: MDPI journal article supplement (https://www.mdpi.com/2414-4088/6/12/113)
Supplement: s1 [file s1 › File S1.pdf]

# General Anamnesis

In the following, we will ask you some questions related to your personal well-being and medical condition. The questions will be asked verbally, and your answers will be recorded by the experimenter (or, if applicable, your company) on this sheet.

If you are uncertain about an answer or if you understood a question correctly, please inform one of the experimenters: [gaspar.ramoa@inventivio.com](mailto:gaspar.ramoa@inventivio.com) | [vincent.schmidt@uni-osnabrueck.de](mailto:vincent.schmidt@uni-osnabrueck.de))

## Participant information:

- Participant Number:
- Participant Gender:
- Date:

## Anamnesis for the study:

1. Do you experience headaches or migraines?
  - a. How often do you experience migraines/headaches?
2. Do or did you experience memory problems?
3. Do or did you experience tremors?
4. Do you experience speech or language impairments?
5. Do you suffer from any behavioural disorders?
  - a. If yes, which one(s)?
6. Do you use psychotropic drugs?
  - a. If yes, which one(s)?
7. Do you have a visual disorder?
  - a. Which type of visual disorder do you have?
  - b. In case of a visual impairment, what is the degree of the visual impairment?

8. Do you use a navigation or visual aid (i.e. guiding dog or white cane)?
9. Can you perceive light and/or changes in light conditions?
10. What is your Braille experience level?
11. Do you have experience with a multi-line braille display (i.e. CANUTE)?
  - a. If yes, how often did you use a display?
  - b. Which display are you using and why?
12. Do you have previous experience with two-dimensional data viewing devices (i.e. HyperBraille)?
  - a. If yes, how often and how long did you use the respective device(s)?
13. Do you have previous experience with 2D tactile graphics?
14. Do you have previous experience with tactile floor plans?
  - a. If yes, how often did you use tactile floor plans and for which purpose(s)?
15. Do you have previous experience with tactile representations of train stations or other transport services?

Exclusion criteria: Constant or frequent headaches or migraines (occasional headache/migraine is common and therefore accepted), memory problems, tremors, speech or language impairments, or age below 18 years lead to automatic exclusion from the study. Potential behavioural disorders and the use of psychotropic drugs will be evaluated based on their type and severity and might also lead to exclusion from the study.

Inclusion criteria: Visual disorder must be on the level of attested blindness or an attested visual impairment.

The remaining questions will neither lead to inclusion nor will they lead to exclusion from the study. These questions merely serve the purpose of keeping track of interpersonal differences between participants with regard to their previous experience with assistive tools and similar devices or materials as the ones used in the study.

In case problems or questions arise regarding the anamnesis questionnaire, please do not hesitate to inform the experimenter!
